# Supplementary material for: Accurate prediction of 1H chemical shifts in interstrand cross-linked DNA
Source: Royal Society of Chemistry journal article supplement (doi:10.1039/c3ra22408b), 2013-01-01
Supplement: c3ra22408b.pdf [file c3ra22408b.pdf]

### Supporting Information

Force-field parameter modifications, based on the GAFF force field<sup>1</sup>, for an ethyl cross-link between mispair-aligned thymine residues:

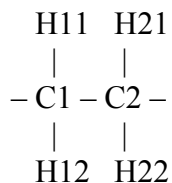

| Atom number        | Atom type | Charge |
|--------------------|-----------|--------|
| C1, C2             | CT        | 0.1710 |
| H11, H12, H21, H22 | HC        | 0.0855 |

Added bond terms:

CT-NA:  $K=418.0 \text{ kcal/mol/\AA}^2$ ,  $r_0=1.388 \text{ \AA}$

Added angle terms:

C-NA-CT:  $K=70.0 \text{ kcal/mol/rad}^2$ ,  $\theta_0=125.20^\circ$

NA-CT-CT:  $K=70.0 \text{ kcal/mol/rad}^2$ ,  $\theta_0=120.00^\circ$

NA-CT-HC:  $K=50.0 \text{ kcal/mol/rad}^2$ ,  $\theta_0=109.50^\circ$

Added dihedral terms:

\*-CT-NA-\*:  $K=1.35 \text{ kcal/mol}$ ,  $n=2$ ,  $\delta=180.0$

- (1) Wang, J. M.; Wolf, R. M.; Caldwell, J. W.; Kollman, P. A.; Case, D. A. *Journal of Computational Chemistry* **2004**, *25*, 1157-1174.
